# Supplementary material
Source: MDPI journal article supplement (https://www.mdpi.com/2674-0494/2/2/16)
Supplement: s1 [file s1]

Archive with 1 entries (1 files):
- meteorology-2333536-supplementary.pdf
